# Supplementary material for: A surfactant-assisted strategy to tailor Li-ion charge transfer interfacial resistance for scalable all-solid-state Li batteries
Source: Royal Society of Chemistry journal article supplement (doi:10.1039/c8se00234g), 2018-01-01
Supplement: c8se00234g1.pdf [file c8se00234g1.pdf]

## Electronic Supplementary Information

### A surfactant-assisted strategy to tailor Li-ion charge transfer interfacial resistance for scalable all-solid-state Li batteries

Chengtian Zhou, Alfred Junio Samson, Kyle Hofstetter, and Venkataraman Thangadurai\*

Department of Chemistry, University of Calgary, 2500 University Dr, NW Calgary AB T2N 1N4 Canada. \*vthangad@ucalgary.ca

## Experimental Section

### Electrolyte preparation and characterization

Garnet-type cubic  $\text{Li}_{6.5}\text{La}_{2.9}\text{Ba}_{0.1}\text{Zr}_{1.4}\text{Ta}_{0.6}\text{O}_{12}$  (LLBZT) was synthesized by conventional solid-state reaction. Stoichiometric amounts of  $\text{LiNO}_3$  (Alfa Aesar, 99.0%),  $\text{La}_2\text{O}_3$  (Alfa Aesar, 99.9% pre-dried at 900 °C for 12 h),  $\text{Ba}(\text{NO}_3)_2$  (Alfa Aesar,  $\geq 99.0\%$ ),  $\text{ZrO}_2$  (Aldrich, 99.0%), and  $\text{Ta}_2\text{O}_5$  (99.0%, Alfa Aesar) were thoroughly mixed for 6 h using a planetary ball mill (Pulverisette, Fritsch, Germany) in isopropanol. 10 wt% excess  $\text{LiNO}_3$  was added to compensate for lithium loss during the calcination and sintering processes. The well-mixed precursors were calcined at 700 °C for 6 h to decompose nitrate. The as-calcined powders were ball-milled and pressed into pellets and calcined at 900 °C for an additional 20 h, resulting pellets were crushed into powders and ball-milled for a final time in isopropanol for 6 h. The dried powders were uniaxially pressed in a 10-mm diameter die at 30 MPa and finally isostatically pressed at 150 MPa. The pellets were covered by the mother powder and sintered at 1150 °C for 6 h in clean alumina crucibles. The obtained pellets (thickness  $\sim 0.9$  mm) were polished on both sides thoroughly with 80, 320 and 1500 grit sand papers using an isopropanol media and stored in an argon filled glovebox until time of use.

Powder X-ray diffraction (Powder X-ray Diffractometer, Model: Bruker D8 Advance) ( $\text{Cu K}\alpha$ , 40 kV, 40 mA) confirms the formation of garnet-type LLBZT. Typical measurements were performed from  $2\theta$  range  $10^\circ$  to  $80^\circ$  at a count rate of 4 s per step of  $0.025^\circ$  at room temperature. Ionic conductivity was measured between 20-150  $^\circ\text{C}$  using a Solartron 1260; the applied voltage is 100 mV with a frequency range of 1 MHz to 0.1 Hz. Scanning electron microscopy imaging was done using a Zeiss Sigma VP.

### **Symmetric cell preparation**

The solution coating consisted of 0.3 M  $\text{Zn}(\text{NO}_3)_2$  dissolved in isopropanol along with 10 wt% P123. Using a micropipette, solution was dropped onto the pellet surface at a loading of  $25 \mu\text{L cm}^{-2}$ , process was repeated two times per side. The sample was then placed in a preheated oven at 350  $^\circ\text{C}$  for 20 minutes to decompose zinc nitrate and partially burn off P123. Pellets were gently polished on the edges with 1500 grit polish papers to remove any possible  $\text{ZnO}$ , once polished sample was transferred back to argon filled glovebox. Lithium granules were rolled into a foil and a disc ( $0.28 \text{ cm}^2$ ) was punched. Garnet samples were sandwiched between two lithium discs and heated on a hotplate at 250  $^\circ\text{C}$  for 1 h. A stainless-steel disc was placed on top of the garnet sandwich while heating to encourage uniform adhesion.

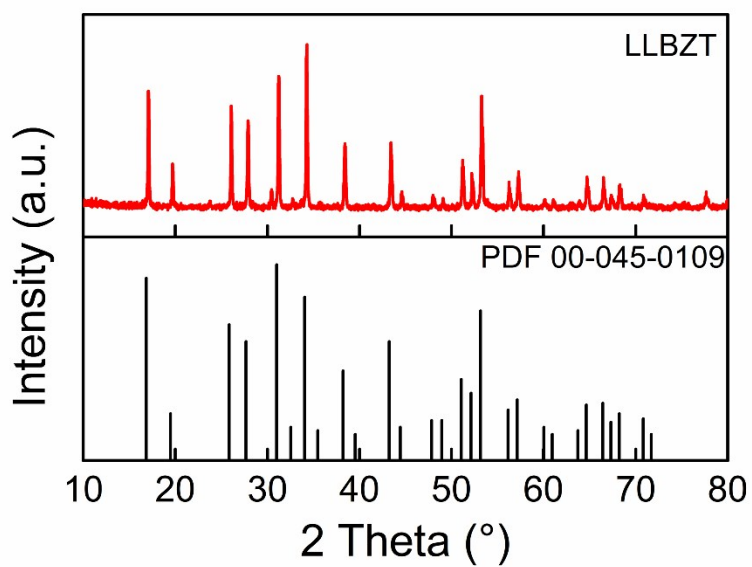

**Figure S1.** X-Ray diffraction (XRD) pattern of as prepared  $\text{Li}_{6.5}\text{La}_{2.9}\text{Ba}_{0.1}\text{Zr}_{1.4}\text{Ta}_{0.6}\text{O}_{12}$  (LLBZT) compared with  $\text{Li}_5\text{La}_3\text{Nb}_2\text{O}_{12}$  reference cubic garnet phase

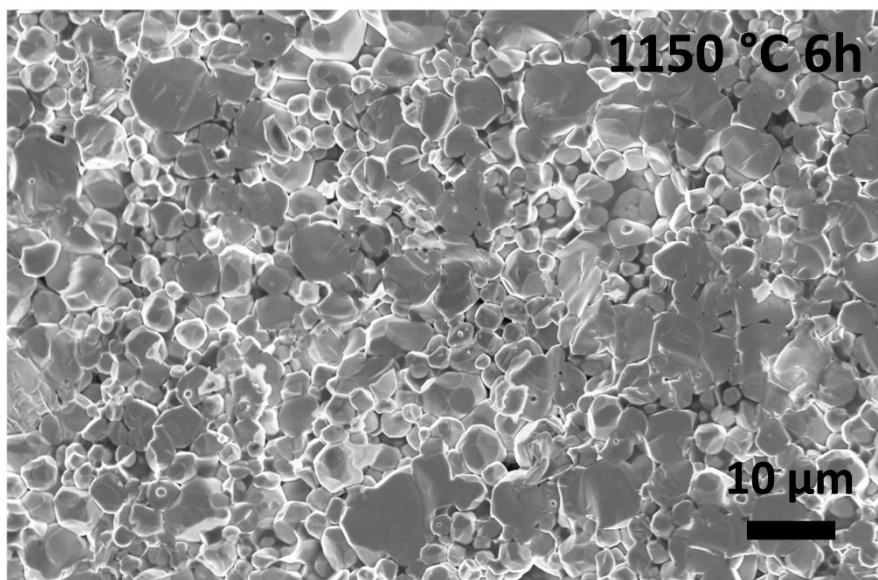

**Figure S2.** Scanning electron microscopy (SEM) image of a fracture cross-section of LLBZT.

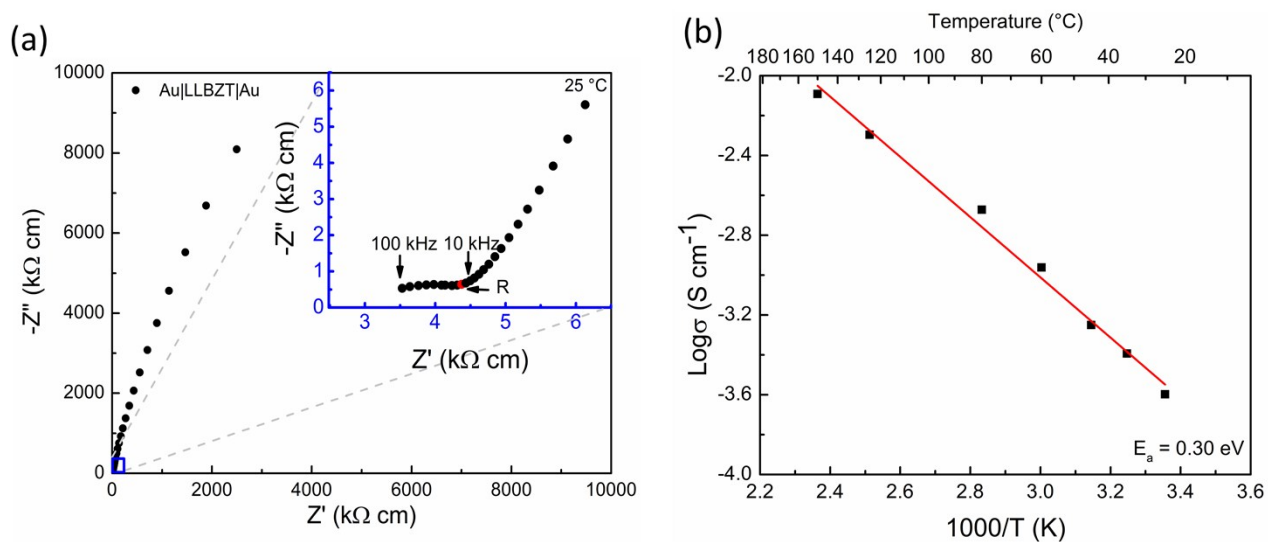

**Figure S3.** (a) Nyquist plot of LLBZT with gold lithium blocking electrodes at 25 °C. Applied voltage is 100 mV with a frequency range of 1 MHz to 0.1 Hz in the temperature range of 20 – 150 °C (b) Arrhenius of LLBZT total ionic conductivity. Conductivity calculated from  $\sigma = (1/R)(l/A)$ , where  $l$  is the thickness of the pellet,  $a$  is the surface area, and  $R$  is the resistance obtained from bulk + grain boundary contributions in the impedance arc.

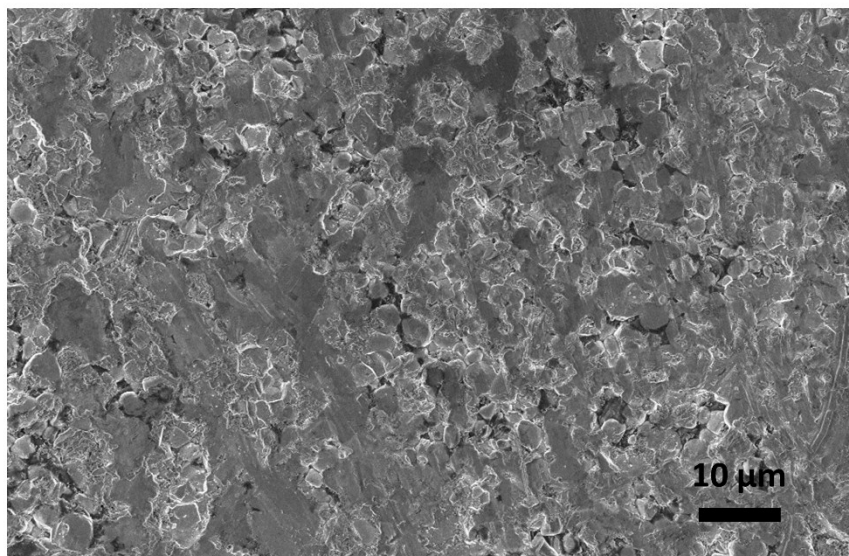

**Figure S4.** SEM image of the LLBZT after polishing with 1500 grit sand paper.

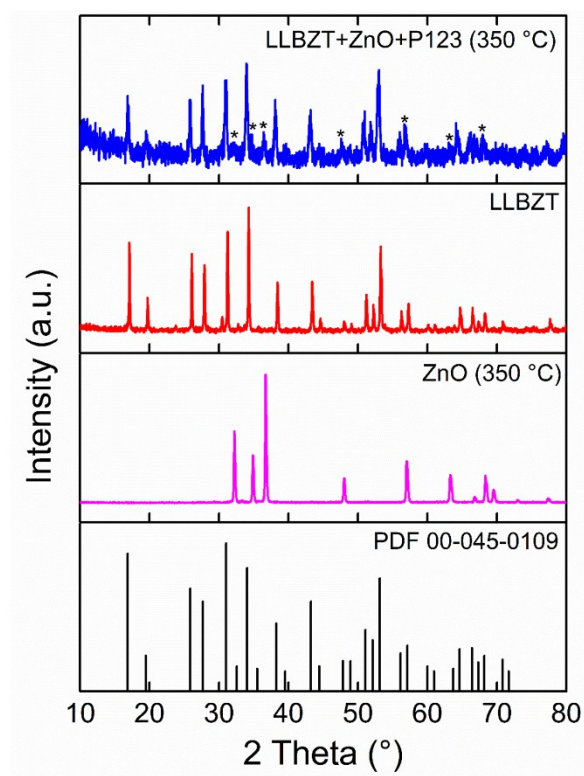

**Figure S5.** XRD pattern of LLBZT after mixing with ZnO+P123 solution and heating to 350 °C showing no other impurity phase has formed when compared to the XRD patterns of only LLBZT and ZnO. XRD pattern of garnet cubic phase reference  $\text{Li}_5\text{La}_3\text{Nb}_2\text{O}_{12}$  (PDF 00-045-0109) is also shown.

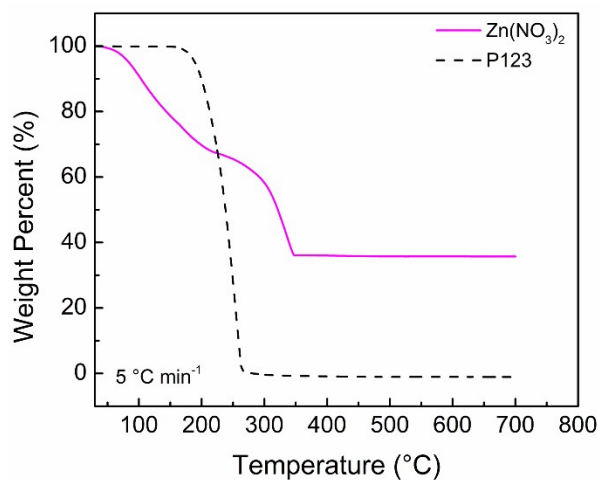

**Figure S6.** Thermogravimetric analysis of  $\text{Zn}(\text{NO}_3)_2 \cdot 6\text{H}_2\text{O}$  (solid pink) and P123 (dashed black) at a heating rate of 5 °C min<sup>-1</sup> under 50:50 Ar:O<sub>2</sub>. The first weight decrease (50-200 °C) for zinc nitrate is associated with dehydration, while the second weight decrease (225-350 °C) is the decomposition of  $\text{Zn}(\text{NO}_3)_2$ :  $2 \text{Zn}(\text{NO}_3)_2 \rightarrow 2 \text{ZnO} + 4 \text{NO}_2 + \text{O}_2$



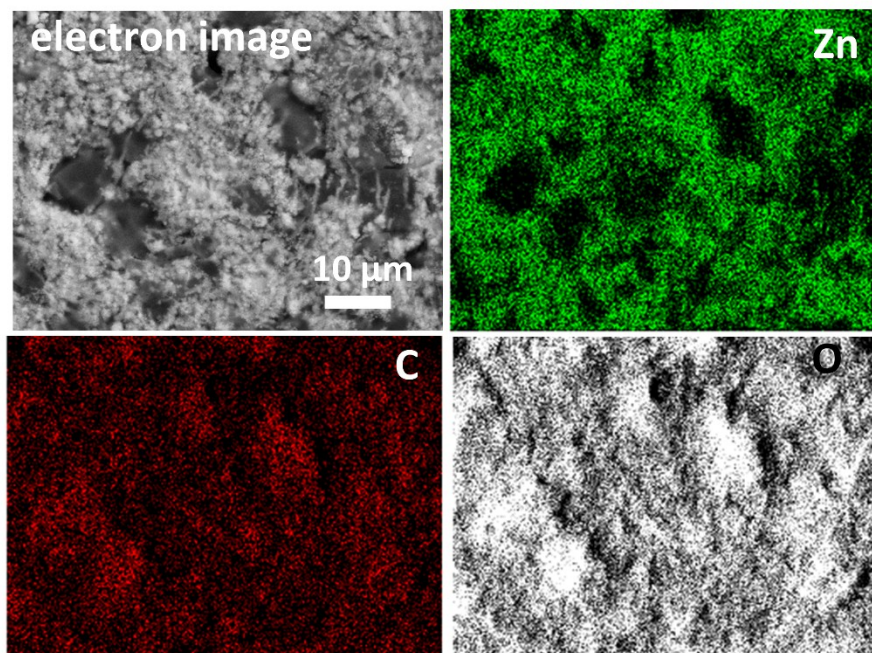

**Figure S7.** (a) SEM image of the top surface of LLBZT after heating a solution 0.3 M  $\text{Zn}(\text{NO}_3)_2$  without P123 (b)-(d) EDX mapping of Zn, C, and O, respectively.

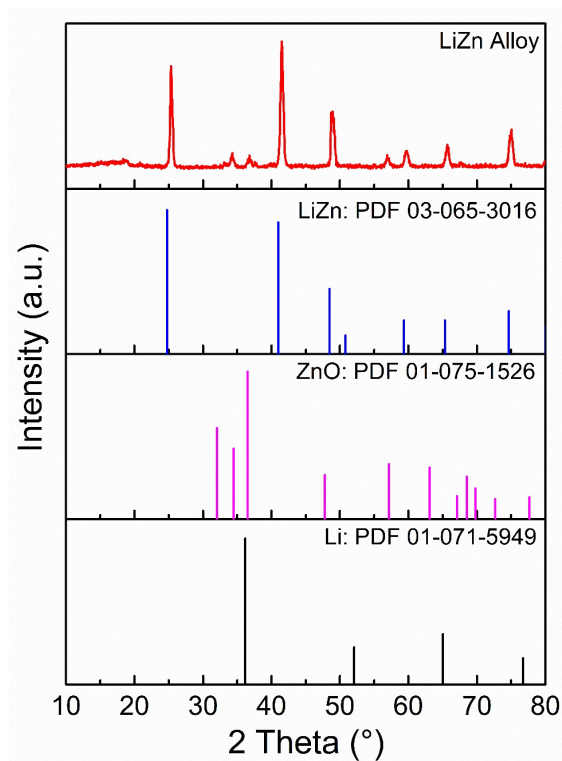

**Figure S8.** XRD pattern of ZnO powder mixed with lithium metal after heating at 250 °C. Lithium (PDF 01-071-5949), ZnO (PDF 01-075-1526) and LiZn (PDF 03-065-3016) added for reference.

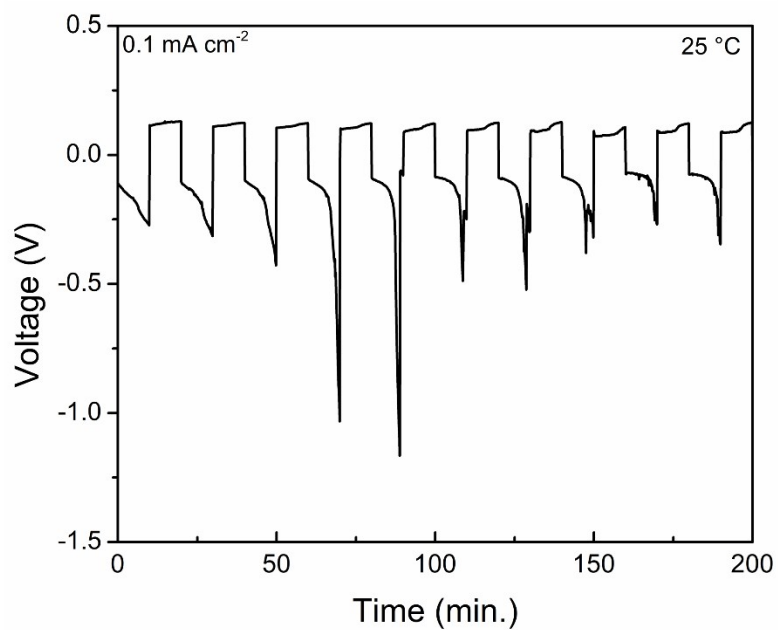

**Figure S9.** Li plating and stripping of untreated Li | LLBZT | Li sample under 0.1 mA cm<sup>-2</sup> at 25 °C. Large potential peaks are attributed to the high interfacial resistance between the lithium anode and garnet interface.

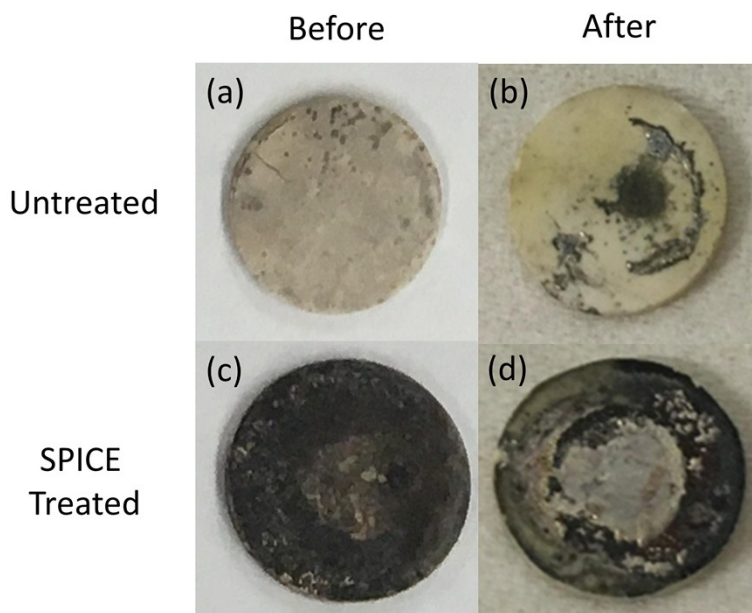

**Figure S10.** Pictures of (a) untreated pellet before lithium plating and stripping (b) after plating and stripping untreated pellet (c) SPICE-treated LLBZT pellets before Li plating and stripping measurements and (d) SPICE treated pellet after lithium plating and stripping.
